# Supplementary material for: New Alphaproteobacteria Thrive in the Depths of the Ocean with Oxygen Gradient
Source: MDPI journal article supplement (doi:10.3390/microorganisms10020455), 2022-02-16
Supplement: s1 [file s1]

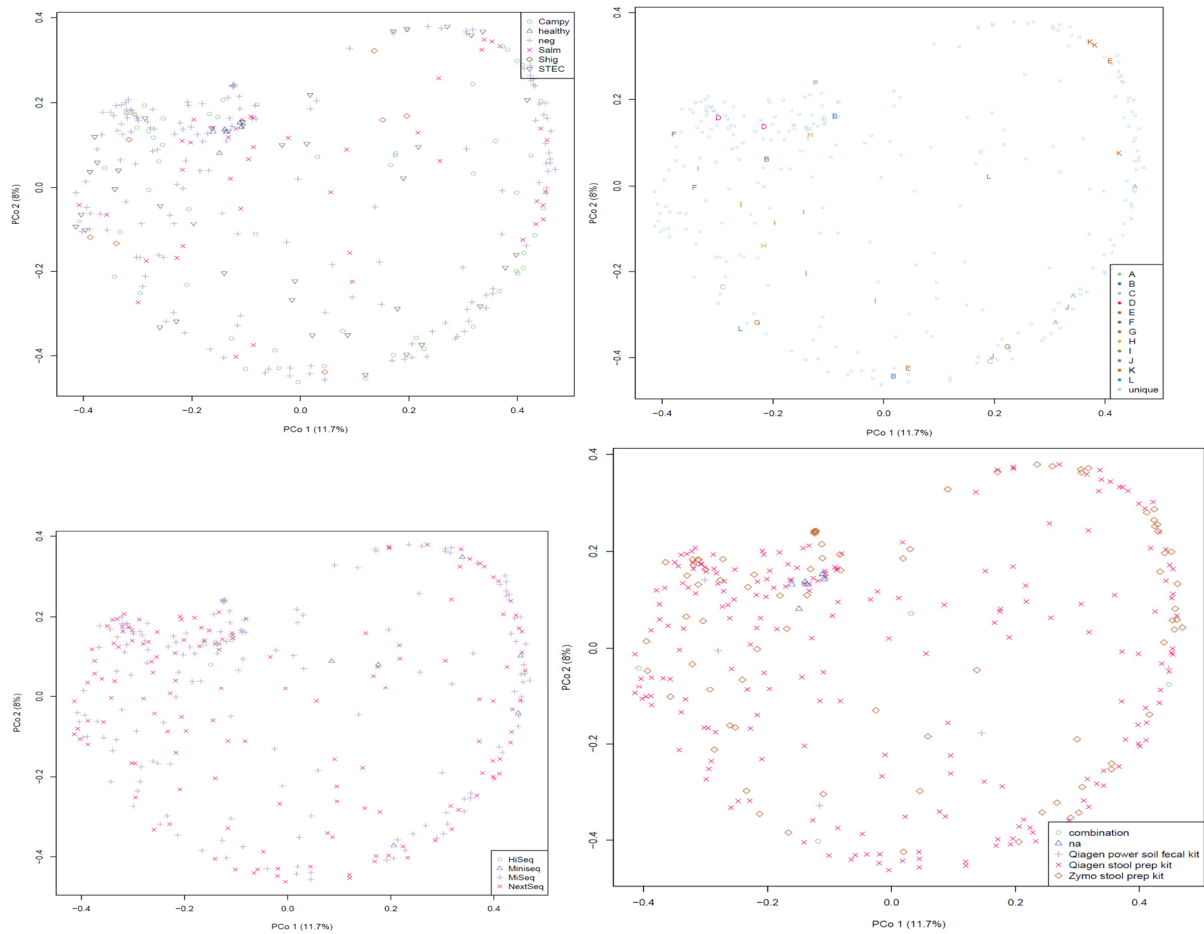

**Figure S1.** Principle coordinate analysis (PCoA) using the Bray Curtis Dissimilarity distance measure among trimmed and normalized metagenomes on groups within each variable, stringent filtering.

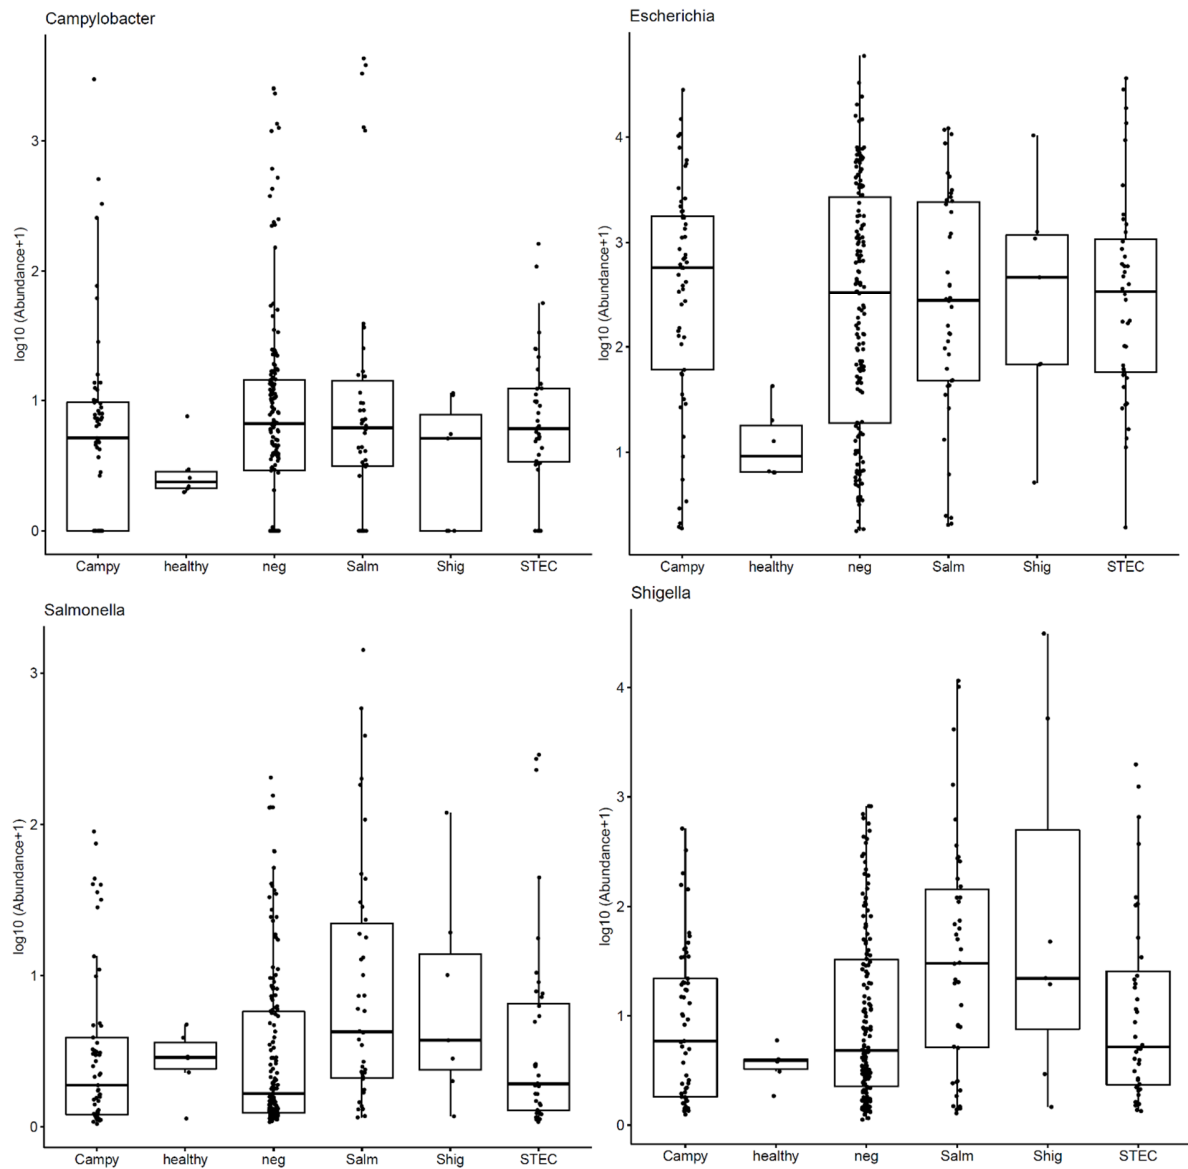

**Figure S2.** Abundance of reads classified as *Campylobacter* (A), *Escherichia* (B), *Salmonella* (C), and *Shigella* (D) as detected in stool metagenomes from *Campylobacter* culture-positive (Campy), *Salmonella* culture-positive (Salm), *Shigella* culture-positive (Shig), STEC culture-positive, culture-negative, and healthy specimens (healthy).

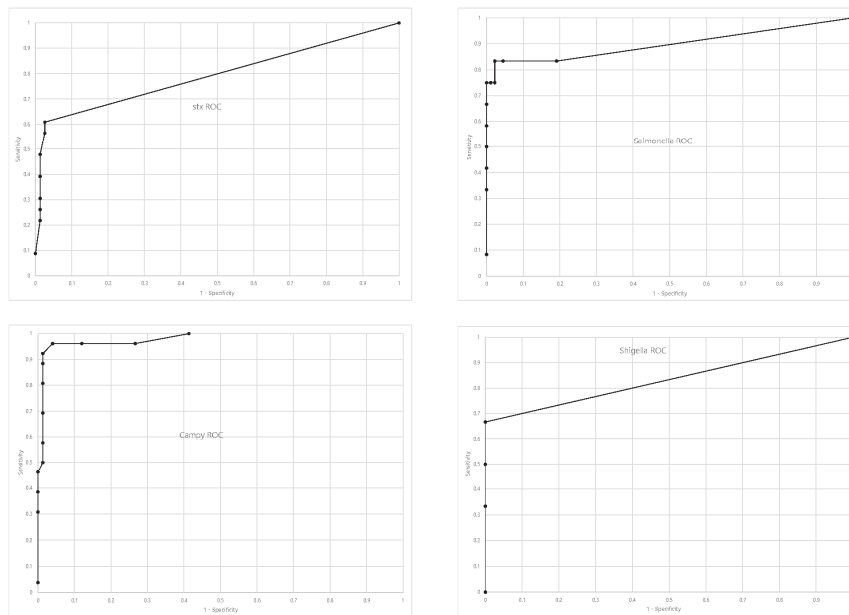

**Figure S3.** Receiver operator characteristic (ROC) curves used to measure the k-mer coverage threshold resulting in the highest sensitivity and specificity for the training set of 104 specimens. (A) *Salmonella*, (B) *Campylobacter*, (C) *Shigella* and (D) *STEC*.
